# Supplementary material
Source: PubMed Central journal article supplement (PMC4227552)
Supplement: pr500418w_si_003.pdf [file pr500418w_si_003.pdf]

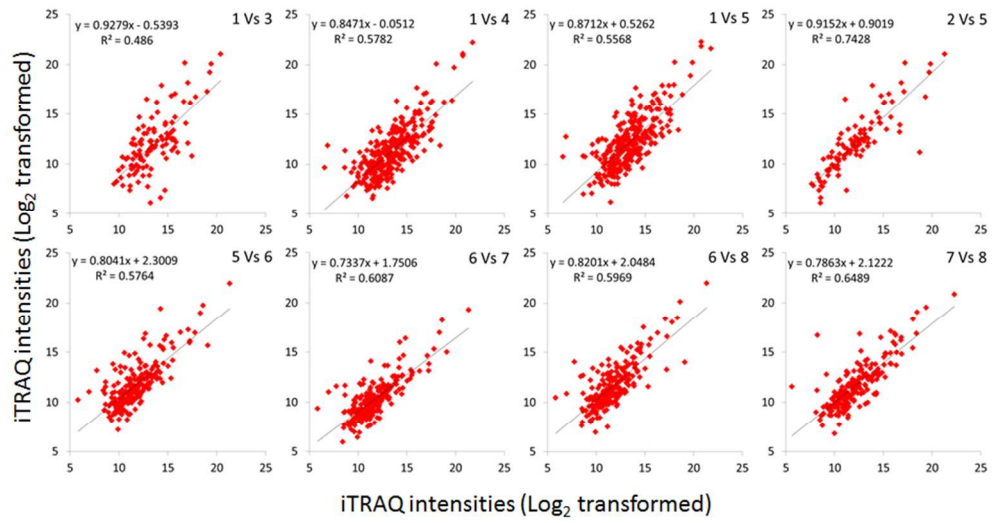

Supplementary Figure S3. Log<sub>2</sub> transformed iTRAQ intensities from GBM tumor sections (y-axis) were plotted against unmatched tumor sections (x-axis). A simple linear regression line was drawn through the data points and the R<sup>2</sup> values were determined for all 8 GBM tumor pairs.

80x51mm (300 x 300 DPI)
